# Supplementary material
Source: MDPI journal article supplement (https://www.mdpi.com/2313-0105/8/11/226)
Supplement: s1 [file s1]

---

## Supplementary Data

### **In-situ Li-In anode formation on the $\text{Li}_7\text{La}_3\text{Zr}_2\text{O}_{12}$ solid electrolyte in all-solid-state battery**

Il'ina E.A.\*, Druzhinin K.V., Lyalin E.D., Talankin I.I.

*Institute of High-Temperature Electrochemistry of Ural Branch of RAS, 620137, Akademicheskaya st., 20,  
Ekaterinburg, Russia*

*\*ilyina@ihte.uran.ru*

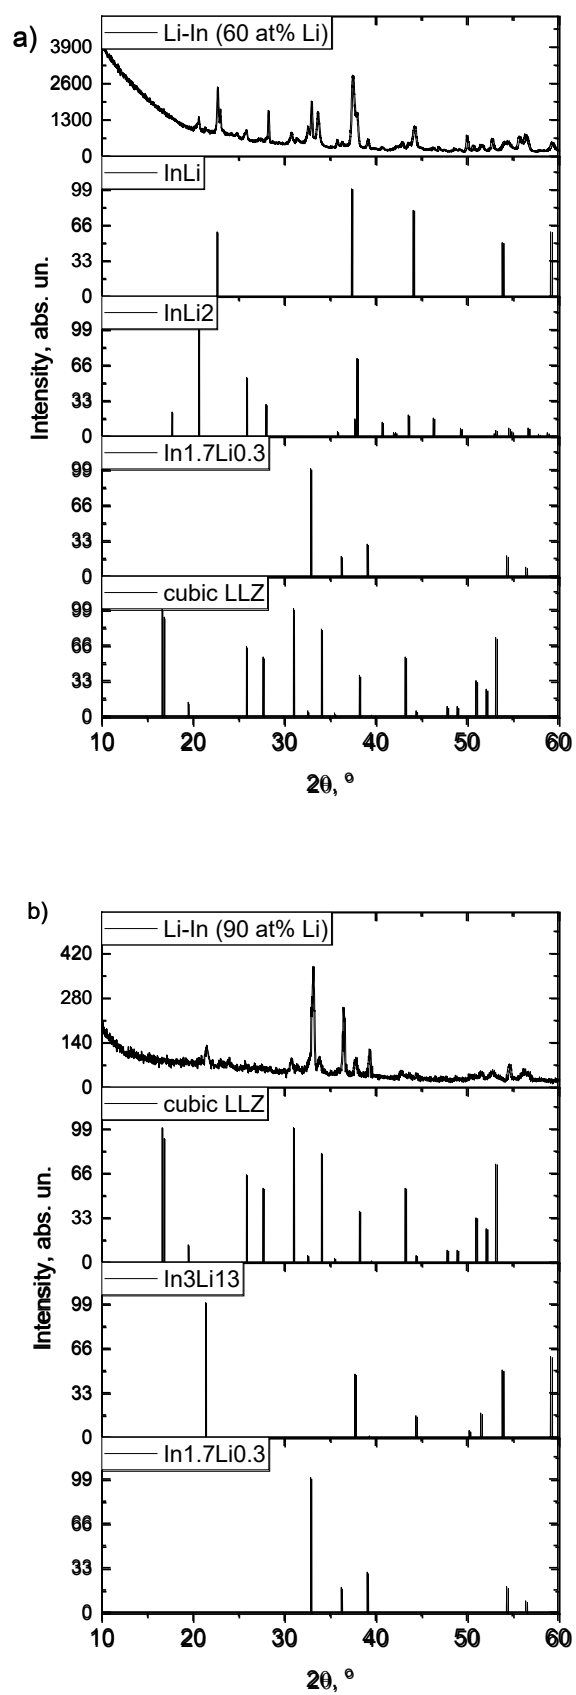

**Figure S1.** XRD data of Li-In anode with 60 (a) and 90 at% Li (b).

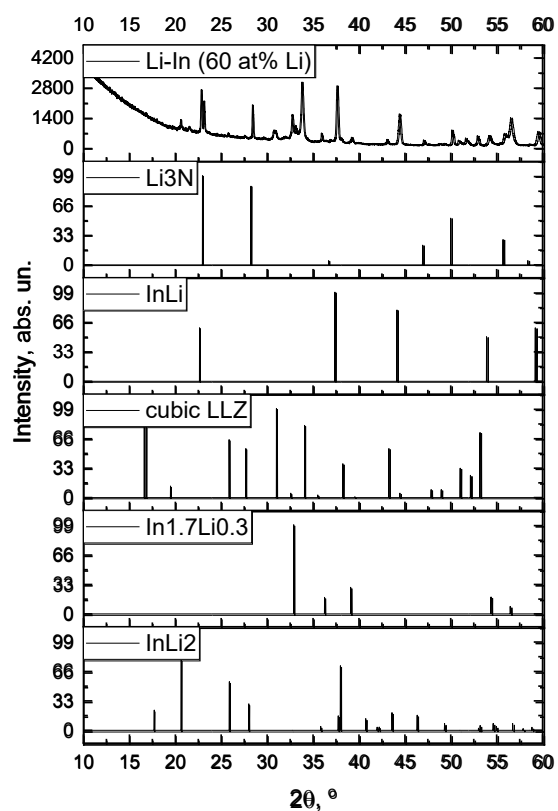

**Figure S2.** XRD data of Li-In anode with 60 at% Li after exposure on air.

**Table S1.** The fitting results of impedance plots at Figure 4b.

| at % Li in Li-In alloy | $R_{el}$ , $\Omega \text{ cm}^2$ | $R_1$ , $\Omega \text{ cm}^2$ | $C_1$ , pF |
|------------------------|----------------------------------|-------------------------------|------------|
| 40                     | 6                                | 85                            | 20         |
| 60                     | 6                                | 60                            | 12         |
| 80                     | 6                                | 42                            | 366        |
| 90                     | 6                                | 22                            | 8          |

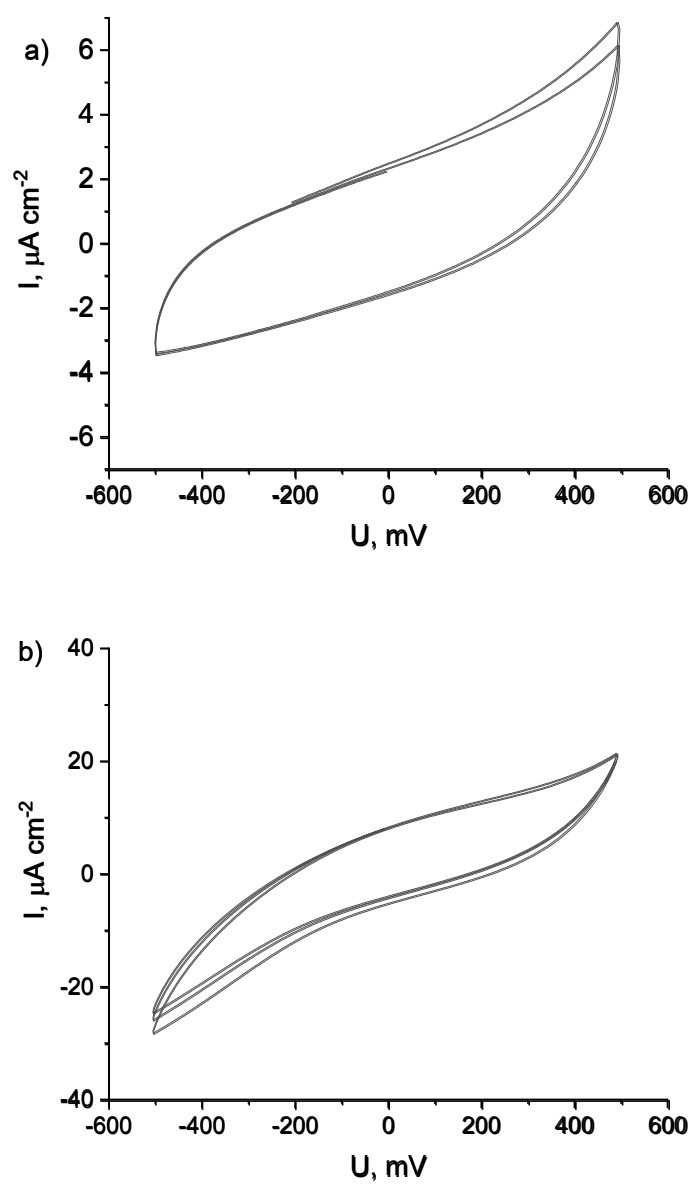

**Figure S3.** Cyclic voltammetry curves for (a)  $\text{Li-In (18 at\% Li) | LLZcomp | Li-In (18 at\% Li)}$  and (b)  $\text{Li | LLZcomp | Li}$  cells with at scanning rate of  $10 \text{ mV s}^{-1}$ .
